# Supplementary material
Source: PubMed Central journal article supplement (PMC6202286)

## Supplementary Information

### *Bioinformatic prediction of Crohn's disease-associated microbial metabolites*

To predict the microbial metabolites associated with Crohn's disease, a previously reported perspective IBD PRISM cohort was used in this study. The following steps were used to generate an initial list of screening metabolites. Step 1: The public available data were downloaded from NCBI (BioProject ID numbers 82111). The microbial compositions were generated from 16S rRNA gene amplicon sequencing data for the healthy and Crohn's disease subjects in the PRISM cohort. We generated a table of the microbial taxa in each sample after the standard pipeline for sequence cleaning and phylotype assignment using MacQiime. Step 2: We imputed the metagenomics function by using a public available software, PICRUST (<http://picrust.github.io/picrust/>). The normalized OTU table were used as an input to predict metagenome by functional KEGG ortholog predictions. Step 3: MelonnPan (an R software, <https://huttenhower.sph.harvard.edu/melonnpan>) was used to predict metabolite compositions. The data matrix of relative abundances of metabolites for each sample were generated. Step 4: Disease-associated metabolites were determined using a multivariate model comparing predicted compound levels in health versus Crohn's disease subjects. We performed a generalized linear mixed model (glmmPQL, implemented in R), correcting for age and medications (antibiotics, immunosuppressants and anti-inflammatory agents). Disease-associated metabolites were ranked by FDR-corrected q value. From this raw list, we selected the top ranked commercially available molecules, tabulated in Supplementary Table 1.

**Supplementary Table 1.** List of screened metabolites

| <b>Metabolite Name</b>             | <b>HMDB_ID</b> | <b>KEGG_ID</b> | <b>Cat.#<br/>(Sigma-Aldrich)</b> |
|------------------------------------|----------------|----------------|----------------------------------|
| L-Phenylalanine                    | HMDB00159      | C00079         | P5482-25G                        |
| gamma-L-Glutamyl-L-cysteine        | HMDB01049      | C00669         | G0903-25MG                       |
| Sulfite                            | HMDB00240      | C00094         | S0505-250G                       |
| D-Fructose 1,6-bisphosphate        | HMDB01058      | C00354         | F6803-1G                         |
| Thiamin monophosphate              | HMDB02666      | C01081         | T8637-5G                         |
| (R)-5-Phosphomevalonate            | HMDB01343      | C01107         | 07841-10MG                       |
| O-Acetyl-L-serine                  | HMDB03011      | C00979         | A6262-10MG                       |
| L-Lysine                           | HMDB00182      | C00047         | L5501-10MG                       |
| 2-Oxoglutarate                     | HMDB00208      | C00026         | K1875-1G                         |
| dTMP                               | HMDB01227      | C00364         | T7004-100MG                      |
| (S)-3-Hydroxy-3-methylglutaryl-CoA | HMDB01375      | C00356         | H6132-5MG                        |
| beta-Alanine                       | HMDB00056      | C00099         | A9920-100G                       |
| alpha-D-Glucose 6-phosphate        | HMDB01401      | C00668         | G7250-10MG                       |
| Phosphoenolpyruvate                | HMDB00263      | C00074         | P7127-100MG                      |
| Glutathione                        | HMDB00125      | C00051         | PHR1359-500MG                    |
| UTP                                | HMDB00285      | C00075         | U6875-100MG                      |
| dTTP                               | HMDB01342      | C00459         | GE27-1880-04                     |
| Hexanoyl-CoA                       | HMDB02845      | C05270         | H2012-5MG                        |
| D-Fructose 6-phosphate             | HMDB00124      | C00085         | F3627-10MG                       |
| 2-Dehydro-3-deoxy-D-gluconate      | HMDB01353      | C00204         | 12271-1MG                        |
| O-Phospho-L-homoserine             | HMDB03484      | C01102         | 04668-50MG                       |
| Succinate                          | HMDB00254      | C00042         | W327700-1KG-K                    |
| Glyoxylate                         | HMDB00119      | C00048         | G10601-25G                       |
| L-Ornithine                        | HMDB00214      | C00077         | O2375-10MG                       |
| GDP-mannose                        | HMDB01163      | C00096         | G5131-10MG                       |
| D-Glyceraldehyde 3-phosphate       | HMDB01112      | C00118         | 39705-1ML                        |
| IMP                                | HMDB00175      | C00130         | I4625-5G                         |
| L-Histidine                        | HMDB00177      | C00135         | H6034-10MG                       |
| Citrate                            | HMDB00094      | C00158         | W302600-1KG-K                    |
| Adenosine                          | HMDB00050      | C00212         | A9251-1G                         |
| D-Mannose 1-phosphate              | HMDB06330      | C00636         | M1755-10MG                       |
| LL-2,6-Diaminoheptanedioate        | HMDB01370      | C00666         | 89469-10MG                       |
| Urocanate/4-Imidazoleacrylic acid  | HMDB00301      | C00785         | 859796-5G                        |
| Isopentenyl diphosphate            | HMDB04196      | C00129         | 00297-10MG                       |

|                          |           |        |                      |
|--------------------------|-----------|--------|----------------------|
| AMP                      | HMDB00045 | C00020 | 01930-5G             |
| CoA                      | HMDB01423 | C00010 | C4282-10MG           |
| UDP                      | HMDB00295 | C00015 | 94330-100MG          |
| L-Glutamate              | HMDB00148 | C00025 | G1501-100G           |
| Glycine                  | HMDB00123 | C00037 | G7126-100G           |
| L-Arginine               | HMDB00517 | C00062 | A5006-100G           |
| CTP                      | HMDB00082 | C00063 | C1506-25MG           |
| Thiamin diphosphate      | HMDB01372 | C00068 | C8754-1G             |
| L-Ascorbate              | HMDB00044 | C00072 | A7631-25G/A4034-100G |
| L-Methionine             | HMDB00696 | C00073 | M9625-5G             |
| Fumarate                 | HMDB00134 | C00122 | F1506-25G            |
| L-Leucine                | HMDB00687 | C00123 | L8000-25G            |
| dATP                     | HMDB01532 | C00131 | D6500-10MG           |
| myo-Inositol             | HMDB00211 | C00137 | I5125-50G            |
| L-Homocysteine           | HMDB00742 | C00155 | 69453-50MG           |
| Acetoacetate             | HMDB00060 | C00164 | A8509-10MG           |
| Agmatine                 | HMDB01432 | C00179 | A7127-1G             |
| D-Glucuronate            | HMDB00127 | C00191 | G8645-5G             |
| Acetyl phosphate         | HMDB01494 | C00227 | A0262-500MG          |
| L-Homoserine             | HMDB00719 | C00263 | H6515-10MG           |
| D-Mannose 6-phosphate    | HMDB01078 | C00275 | M3655-100MG          |
| Creatine                 | HMDB00064 | C00300 | C0780-10MG           |
| Isocitrate               | HMDB00193 | C00311 | 58790-250MG          |
| L-Citrulline             | HMDB00904 | C00327 | C7629-1G             |
| 6-Phospho-D-gluconate    | HMDB01316 | C00345 | 55962-10MG           |
| Phosphatidylethanolamine | HMDB60501 | C00350 | 1535744-100MG        |
| cis-Aconitate            | HMDB00072 | C00417 | A3412-1G             |
| (R)-Mevalonate           | HMDB59629 | C00418 | 50838-10MG           |
| 5,6-Dihydrouracil        | HMDB00076 | C00429 | D7628-5G             |
| dCTP                     | HMDB00998 | C00458 | D4635-25MG           |
| Glutaryl-CoA             | HMDB01339 | C00527 | G9510-5MG            |
| Pyridoxine phosphate     | HMDB01319 | C00627 | 82890-10MG           |
| (S)-Methylmalonyl-CoA    | HMDB02310 | C00683 | M1762-1MG            |
| Deamino-NAD (NAADP)      | HMDB01179 | C00857 | N6506-25MG           |
| L-Histidinol             | HMDB03431 | C00860 | H6647-10MG           |
| Crotonoyl-CoA            | HMDB02009 | C00877 | 28007-5MG            |
| Dephospho-CoA            | HMDB01373 | C00882 | D3385-5MG            |
| L-Histidinol phosphate   |           | C01100 | 41486-10MG           |

|                                                              |           |        |                                                           |
|--------------------------------------------------------------|-----------|--------|-----------------------------------------------------------|
| L-Galactono-1,4-lactone                                      | HMDB02541 | C01115 | 05313-100MG                                               |
| D-Ribulose 1,5-bisphosphate                                  | HMDB11688 | C01182 | 83895-10MG                                                |
| 3-Methylbutanoyl-CoA                                         | HMDB01113 | C02939 | I9381-10MG                                                |
| cis-Homoaconitate                                            |           | C04002 | 40487-10MG                                                |
| 1-(5'-Phosphoribosyl)-5-amino-4-imidazolecarboxamide (AICAR) | HMDB01517 | C04677 | A9978-25MG                                                |
| Succinyl-CoA                                                 | HMDB01022 | C00091 | S1129-5MG                                                 |
| Glycerone phosphate                                          | HMDB01473 | C00111 | 37442-100MG-F                                             |
| Proline betaine                                              | HMDB04827 | C10172 | sc-296420(Santa Cruz)                                     |
| Suberic acid                                                 | HMDB00893 | C08278 | S5200-5G                                                  |
| Oleic acid                                                   | HMDB00207 | C00712 | O1008-1G                                                  |
| Tyramine                                                     | HMDB00306 | C00483 | T90344-5G                                                 |
| Niacinamide                                                  | HMDB01406 | C00153 | N5535-100G                                                |
| Arachidonic acid                                             | HMDB01043 | C00219 | A3555-10MG                                                |
| Caprylic acid                                                | HMDB00482 | C06423 | PHR1202-1G                                                |
| Linoleic acid                                                | HMDB00673 | C01595 | L1376-1G                                                  |
| L-Tyrosine                                                   | HMDB00158 | C00082 | T8566-25G                                                 |
| Butyric acid                                                 | HMDB00039 | C00246 | B103500-100ML                                             |
| cis-4,7,10,13,16,19-Docosahexaenoic acid                     | HMDB02183 | C06429 | D2534-25MG                                                |
| L-Isoleucine                                                 | HMDB00172 | C00407 | I2752-5G                                                  |
| Sebacic acid                                                 | HMDB00792 | C08277 | 283258-5G                                                 |
| 4-Vinylphenol                                                | HMDB04072 | C05627 | sc-267756; (Santa Cruz), 10% solution in propylene glycol |
| Oleamide                                                     | HMDB02117 | C19670 | O2136-100MG                                               |
| Propionic acid                                               | HMDB00237 | C00163 | P1386-500ML                                               |
| Stigmasterol                                                 | HMDB00937 | C05442 | S2424-1G                                                  |
| Shikimic acid                                                | HMDB03070 | C00493 | S5375-1G                                                  |
| N-Acetylputrescine                                           | HMDB02064 | C02714 | A8784-25MG                                                |
| Hexanoic acid                                                | HMDB00535 | C01585 | 153745-2.5G                                               |
| Pyridoxamine dihydrochloride                                 | HMDB01431 | C00534 | P9380-1G                                                  |
| N-a-Acetyl-L-arginine                                        | HMDB04620 |        | S451029-250MG                                             |
| L-Carnitine                                                  | HMDB00062 | C00318 | C0158-1G                                                  |
| Azelaic acid (98%)                                           | HMDB00784 | C08261 | 246379-25G                                                |
| Dodecanedioic acid                                           | HMDB00623 | C02678 | D1009-100G                                                |
| Nicotinic acid                                               | HMDB01488 | C00253 | N4126-5G                                                  |
| 1,2,4-Trimethylbenzene                                       | HMDB13733 | C14533 | T73601-25ML                                               |
| Isovaleric acid                                              | HMDB00718 | C08262 | 129542-100ML                                              |

|                                                                 |           |        |                        |
|-----------------------------------------------------------------|-----------|--------|------------------------|
| Taurine                                                         | HMDB00251 | C00245 | T0625-10G              |
| Phenylacetic acid                                               | HMDB00209 | C07086 | P16621-5G              |
| Putrescine                                                      | HMDB01414 | C00134 | 51799-100MG            |
| L-(+)-Lactic acid                                               | HMDB00190 | C00186 | L1750-10G              |
| Piperidine                                                      | HMDB34301 | C01746 | 76046-<br>100MG/411027 |
| gamma-butyrobetaine/(3-Carboxypropyl)trimethylammonium chloride | HMDB01161 | C01181 | 403245-1G              |
| D-Glyceric acid                                                 | HMDB00139 | C00258 | 61786-10MG             |
| Cyclohexylamine                                                 | HMDB31404 | C00571 | G6503-1G               |
| 4-Guanidinobutyric acid                                         | HMDB03464 | C01035 | G6503-1G               |
| 1-Oleoyl-sn-glycero-3-phosphocholine(synthetic, ≥99%)           | HMDB02815 | C04230 | L1881-5MG              |
| Cadaverine                                                      | HMDB02322 | C01672 | 33211-10ML-F           |
| L(-)-Fucose                                                     | HMDB00174 | C01019 | F2252-10MG             |
| 2-Palmitoylglycerol                                             | HMDB11533 |        | 75614-25MG             |
| Cholesteryl oleate                                              | HMDB00918 | C14641 | C9253-100MG            |
| Histamine                                                       | HMDB00870 | C00388 | H7125-1G               |
| D-Pantothenic acid                                              | HMDB00210 | C00864 | P5155-100G             |
| dGDP                                                            | HMDB00960 | C00361 | D9250-25MG             |
| Tetradecanoyl-CoA                                               | HMDB01521 | C02593 | M4414-5MG              |
| NAD                                                             | HMDB00902 | C00003 | N7004-250MG            |
| ADP                                                             | HMDB01341 | C00008 | A2754-100MG            |
| FAD                                                             | HMDB01248 | C00016 | F6625-10MG             |
| S-Adenosyl-L-methionine                                         | HMDB01185 | C00019 | A7007-25MG             |
| Acetyl-CoA                                                      | HMDB01206 | C00024 | A2056-10MG             |
| GDP                                                             | HMDB01201 | C00035 | G7127-25MG             |
| FMN                                                             | HMDB01520 | C00061 | F2253-25MG             |
| GMP                                                             | HMDB01397 | C00144 | G8377-500MG            |
| D-Erythrose 4-phosphate                                         | HMDB01321 | C00279 | E0377-10MG             |
| dGTP                                                            | HMDB01440 | C00286 | D4010-10MG             |
| Acetoacetyl-CoA                                                 | HMDB01484 | C00332 | A1625-10MG             |
| dUMP                                                            | HMDB01409 | C00365 | D3876-100MG            |
| 5-Aminolevulinate                                               | HMDB01149 | C00430 | A3785-500MG            |
| Homogentisate                                                   | HMDB00130 | C00544 | H0751-100MG            |

**Supplementary Table 2.** Gut OTUs containing enzymes of the D-sorbitol pathway

| <b>OTU_IDs</b> | <b>Consensus Lineage</b>                                                                                                |
|----------------|-------------------------------------------------------------------------------------------------------------------------|
| 156580         | k__Bacteria; p__Proteobacteria; c__Betaproteobacteria;<br>o__Burkholderiales; f__Burkholderiaceae; g__Burkholderia; s__ |
| 4322414        | k__Bacteria; p__Proteobacteria; c__Betaproteobacteria;<br>o__Burkholderiales; f__Burkholderiaceae; g__Burkholderia; s__ |
| 49998          | k__Bacteria; p__Proteobacteria; c__Betaproteobacteria;<br>o__Burkholderiales; f__Burkholderiaceae; g__Burkholderia; s__ |
| 4311006        | k__Bacteria; p__Proteobacteria; c__Betaproteobacteria;<br>o__Burkholderiales; f__Burkholderiaceae; g__Burkholderia; s__ |
| 135993         | k__Bacteria; p__Proteobacteria; c__Betaproteobacteria;<br>o__Burkholderiales; f__Burkholderiaceae; g__Burkholderia; s__ |

**Supplementary Table 3.** Gut OTUs containing enzymes of the 2,5-diketo-D-gluconic acid pathway

| OTU_IDs | Consensus Lineage                                                                                                          |
|---------|----------------------------------------------------------------------------------------------------------------------------|
| 4368451 | k__Bacteria; p__Proteobacteria; c__Alphaproteobacteria; o__Rhizobiales; f__Phyllobacteriaceae; g__ ; s__                   |
| 221365  | k__Bacteria; p__Proteobacteria; c__Alphaproteobacteria; o__Rhodospirillales; f__Acetobacteraceae; g__ ; s__                |
| 4369186 | k__Bacteria; p__Proteobacteria; c__Alphaproteobacteria; o__Rhodospirillales; f__Acetobacteraceae; g__ ; s__                |
| 4343884 | k__Bacteria; p__Proteobacteria; c__Alphaproteobacteria; o__Rhodospirillales; f__Acetobacteraceae; g__ ; s__                |
| 648004  | k__Bacteria; p__Proteobacteria; c__Alphaproteobacteria; o__Rhodospirillales; f__Acetobacteraceae; g__ ; s__                |
| 772368  | k__Bacteria; p__Proteobacteria; c__Alphaproteobacteria; o__Rhodospirillales; f__Acetobacteraceae; g__ ; s__                |
| 88754   | k__Bacteria; p__Proteobacteria; c__Alphaproteobacteria; o__Rhodospirillales; f__Acetobacteraceae; g__ ; s__                |
| 2228274 | k__Bacteria; p__Proteobacteria; c__Alphaproteobacteria; o__Rhodospirillales; f__Acetobacteraceae; g__ ; s__                |
| 1044767 | k__Bacteria; p__Proteobacteria; c__Alphaproteobacteria; o__Rhodospirillales; f__Acetobacteraceae; g__ ; s__                |
| 639311  | k__Bacteria; p__Proteobacteria; c__Alphaproteobacteria; o__Rhodospirillales; f__Acetobacteraceae; g__ ; s__                |
| 163322  | k__Bacteria; p__Proteobacteria; c__Alphaproteobacteria; o__Rhodospirillales; f__Acetobacteraceae; g__ ; s__                |
| 929312  | k__Bacteria; p__Proteobacteria; c__Alphaproteobacteria; o__Rhodospirillales; f__Acetobacteraceae; g__Roseomonas; s__mucosa |
| 236142  | k__Bacteria; p__Proteobacteria; c__Gammaproteobacteria; o__Enterobacteriales; f__Enterobacteriaceae; g__ ; s__             |
| 1119540 | k__Bacteria; p__Proteobacteria; c__Gammaproteobacteria; o__Enterobacteriales; f__Enterobacteriaceae; g__ ; s__             |
| 510870  | k__Bacteria; p__Proteobacteria; c__Gammaproteobacteria; o__Enterobacteriales; f__Enterobacteriaceae; g__ ; s__             |
| 819636  | k__Bacteria; p__Proteobacteria; c__Gammaproteobacteria; o__Enterobacteriales; f__Enterobacteriaceae; g__ ; s__             |
| 4456892 | k__Bacteria; p__Proteobacteria; c__Gammaproteobacteria; o__Enterobacteriales; f__Enterobacteriaceae; g__ ; s__             |
| 213522  | k__Bacteria; p__Proteobacteria; c__Gammaproteobacteria; o__Enterobacteriales; f__Enterobacteriaceae; g__ ; s__             |
| 540402  | k__Bacteria; p__Proteobacteria; c__Gammaproteobacteria; o__Enterobacteriales; f__Enterobacteriaceae; g__ ; s__             |
| 219248  | k__Bacteria; p__Proteobacteria; c__Gammaproteobacteria; o__Enterobacteriales; f__Enterobacteriaceae; g__ ; s__             |

|         |                                                                                                                          |
|---------|--------------------------------------------------------------------------------------------------------------------------|
| 3944484 | k__Bacteria; p__Proteobacteria; c__Gammaproteobacteria;<br>o__Enterobacteriales; f__Enterobacteriaceae; g__ ; s__        |
| 819387  | k__Bacteria; p__Proteobacteria; c__Gammaproteobacteria;<br>o__Enterobacteriales; f__Enterobacteriaceae; g__ ; s__        |
| 1110763 | k__Bacteria; p__Proteobacteria; c__Gammaproteobacteria;<br>o__Enterobacteriales; f__Enterobacteriaceae; g__ ; s__        |
| 238820  | k__Bacteria; p__Proteobacteria; c__Gammaproteobacteria;<br>o__Enterobacteriales; f__Enterobacteriaceae; g__ ; s__        |
| 4432891 | k__Bacteria; p__Proteobacteria; c__Gammaproteobacteria;<br>o__Enterobacteriales; f__Enterobacteriaceae; g__ ; s__        |
| 578058  | k__Bacteria; p__Proteobacteria; c__Gammaproteobacteria;<br>o__Enterobacteriales; f__Enterobacteriaceae; g__ Erwinia; s__ |
| 239362  | k__Bacteria; p__Proteobacteria; c__Gammaproteobacteria;<br>o__Enterobacteriales; f__Enterobacteriaceae; g__ Erwinia; s__ |
| 9939    | k__Bacteria; p__Proteobacteria; c__Gammaproteobacteria;<br>o__Enterobacteriales; f__Enterobacteriaceae; g__ Erwinia; s__ |
| 138826  | k__Bacteria; p__Proteobacteria; c__Gammaproteobacteria;<br>o__Enterobacteriales; f__Enterobacteriaceae; g__ Erwinia; s__ |
| 806143  | k__Bacteria; p__Proteobacteria; c__Gammaproteobacteria;<br>o__Enterobacteriales; f__Enterobacteriaceae; g__ Erwinia; s__ |
| 813564  | k__Bacteria; p__Proteobacteria; c__Gammaproteobacteria;<br>o__Enterobacteriales; f__Enterobacteriaceae; g__ Erwinia; s__ |
| 4430681 | k__Bacteria; p__Proteobacteria; c__Gammaproteobacteria;<br>o__Enterobacteriales; f__Enterobacteriaceae; g__ Erwinia; s__ |
| 4318990 | k__Bacteria; p__Proteobacteria; c__Gammaproteobacteria;<br>o__Enterobacteriales; f__Enterobacteriaceae; g__ Erwinia; s__ |
| 656889  | k__Bacteria; p__Proteobacteria; c__Gammaproteobacteria;<br>o__Enterobacteriales; f__Enterobacteriaceae; g__ Erwinia; s__ |
| 4067355 | k__Bacteria; p__Proteobacteria; c__Gammaproteobacteria;<br>o__Enterobacteriales; f__Enterobacteriaceae; g__ Erwinia; s__ |
| 835346  | k__Bacteria; p__Proteobacteria; c__Gammaproteobacteria;<br>o__Enterobacteriales; f__Enterobacteriaceae; g__ Erwinia; s__ |
| 9826    | k__Bacteria; p__Proteobacteria; c__Gammaproteobacteria;<br>o__Enterobacteriales; f__Enterobacteriaceae; g__ Erwinia; s__ |
| 9912    | k__Bacteria; p__Proteobacteria; c__Gammaproteobacteria;<br>o__Enterobacteriales; f__Enterobacteriaceae; g__ Erwinia; s__ |
| 1022184 | k__Bacteria; p__Proteobacteria; c__Gammaproteobacteria;<br>o__Enterobacteriales; f__Enterobacteriaceae; g__ Erwinia; s__ |
| 1134377 | k__Bacteria; p__Proteobacteria; c__Gammaproteobacteria;<br>o__Enterobacteriales; f__Enterobacteriaceae; g__ Erwinia; s__ |
| 4417158 | k__Bacteria; p__Proteobacteria; c__Gammaproteobacteria;<br>o__Enterobacteriales; f__Enterobacteriaceae; g__ Erwinia; s__ |
| 688934  | k__Bacteria; p__Proteobacteria; c__Gammaproteobacteria;<br>o__Enterobacteriales; f__Enterobacteriaceae; g__ Erwinia; s__ |
| 167120  | k__Bacteria; p__Proteobacteria; c__Gammaproteobacteria;<br>o__Enterobacteriales; f__Enterobacteriaceae; g__ Erwinia; s__ |



|         |                                                                                                                                  |
|---------|----------------------------------------------------------------------------------------------------------------------------------|
| 4250206 | k__Bacteria; p__Proteobacteria; c__Gammaproteobacteria;<br>o__Enterobacteriales; f__Enterobacteriaceae; g__Erwinia; s__          |
| 585701  | k__Bacteria; p__Proteobacteria; c__Gammaproteobacteria;<br>o__Enterobacteriales; f__Enterobacteriaceae; g__Erwinia; s__          |
| 9918    | k__Bacteria; p__Proteobacteria; c__Gammaproteobacteria;<br>o__Enterobacteriales; f__Enterobacteriaceae; g__Erwinia; s__          |
| 817254  | k__Bacteria; p__Proteobacteria; c__Gammaproteobacteria;<br>o__Enterobacteriales; f__Enterobacteriaceae; g__Erwinia; s__ dispersa |
| 539107  | k__Bacteria; p__Proteobacteria; c__Gammaproteobacteria;<br>o__Enterobacteriales; f__Enterobacteriaceae; g__Erwinia; s__ dispersa |
| 808540  | k__Bacteria; p__Proteobacteria; c__Gammaproteobacteria;<br>o__Enterobacteriales; f__Enterobacteriaceae; g__Erwinia; s__ dispersa |
| 169538  | k__Bacteria; p__Proteobacteria; c__Gammaproteobacteria;<br>o__Enterobacteriales; f__Enterobacteriaceae; g__Erwinia; s__ dispersa |
| 825033  | k__Bacteria; p__Proteobacteria; c__Gammaproteobacteria;<br>o__Enterobacteriales; f__Enterobacteriaceae; g__Erwinia; s__ dispersa |
| 372473  | k__Bacteria; p__Proteobacteria; c__Gammaproteobacteria;<br>o__Enterobacteriales; f__Enterobacteriaceae; g__Erwinia; s__ soli     |
| 3159130 | k__Bacteria; p__Proteobacteria; c__Gammaproteobacteria;<br>o__Enterobacteriales; f__Enterobacteriaceae; g__Serratia; s__         |
| 1726426 | k__Bacteria; p__Proteobacteria; c__Gammaproteobacteria;<br>o__Enterobacteriales; f__Enterobacteriaceae; g__Serratia; s__         |
| 4454068 | k__Bacteria; p__Proteobacteria; c__Gammaproteobacteria;<br>o__Enterobacteriales; f__Enterobacteriaceae; g__Serratia; s__         |
| 540793  | k__Bacteria; p__Proteobacteria; c__Gammaproteobacteria;<br>o__Enterobacteriales; f__Enterobacteriaceae; g__Serratia; s__         |
| 4360511 | k__Bacteria; p__Proteobacteria; c__Gammaproteobacteria;<br>o__Enterobacteriales; f__Enterobacteriaceae; g__Serratia; s__         |
| 759061  | k__Bacteria; p__Proteobacteria; c__Gammaproteobacteria;<br>o__Enterobacteriales; f__Enterobacteriaceae; g__Yersinia; s__         |
| 244248  | k__Bacteria; p__Proteobacteria; c__Gammaproteobacteria;<br>o__Pseudomonadales; f__Pseudomonadaceae; g__ ; s__                    |
| 4382169 | k__Bacteria; p__Proteobacteria; c__Gammaproteobacteria;<br>o__Pseudomonadales; f__Pseudomonadaceae; g__Azorhizophilus; s__       |
| 358042  | k__Bacteria; p__Proteobacteria; c__Gammaproteobacteria;<br>o__Pseudomonadales; f__Pseudomonadaceae; g__Pseudomonas; s__          |
| 133961  | k__Bacteria; p__Proteobacteria; c__Gammaproteobacteria;<br>o__Pseudomonadales; f__Pseudomonadaceae; g__Pseudomonas; s__          |
| 139321  | k__Bacteria; p__Proteobacteria; c__Gammaproteobacteria;<br>o__Pseudomonadales; f__Pseudomonadaceae; g__Pseudomonas; s__          |
| 813216  | k__Bacteria; p__Proteobacteria; c__Gammaproteobacteria;<br>o__Pseudomonadales; f__Pseudomonadaceae; g__Pseudomonas; s__          |
| 279948  | k__Bacteria; p__Proteobacteria; c__Gammaproteobacteria;<br>o__Pseudomonadales; f__Pseudomonadaceae; g__Pseudomonas; s__          |
| 171527  | k__Bacteria; p__Proteobacteria; c__Gammaproteobacteria;<br>o__Pseudomonadales; f__Pseudomonadaceae; g__Pseudomonas; s__          |

|         |                                                                                                                         |
|---------|-------------------------------------------------------------------------------------------------------------------------|
| 350105  | k__Bacteria; p__Proteobacteria; c__Gammaproteobacteria;<br>o__Pseudomonadales; f__Pseudomonadaceae; g__Pseudomonas; s__ |
| 242070  | k__Bacteria; p__Proteobacteria; c__Gammaproteobacteria;<br>o__Pseudomonadales; f__Pseudomonadaceae; g__Pseudomonas; s__ |
| 104313  | k__Bacteria; p__Proteobacteria; c__Gammaproteobacteria;<br>o__Pseudomonadales; f__Pseudomonadaceae; g__Pseudomonas; s__ |
| 3290367 | k__Bacteria; p__Proteobacteria; c__Gammaproteobacteria;<br>o__Pseudomonadales; f__Pseudomonadaceae; g__Pseudomonas; s__ |
| 141206  | k__Bacteria; p__Proteobacteria; c__Gammaproteobacteria;<br>o__Pseudomonadales; f__Pseudomonadaceae; g__Pseudomonas; s__ |
| 218267  | k__Bacteria; p__Proteobacteria; c__Gammaproteobacteria;<br>o__Pseudomonadales; f__Pseudomonadaceae; g__Pseudomonas; s__ |
| 271238  | k__Bacteria; p__Proteobacteria; c__Gammaproteobacteria;<br>o__Pseudomonadales; f__Pseudomonadaceae; g__Pseudomonas; s__ |
| 553648  | k__Bacteria; p__Proteobacteria; c__Gammaproteobacteria;<br>o__Pseudomonadales; f__Pseudomonadaceae; g__Pseudomonas; s__ |
| 617271  | k__Bacteria; p__Proteobacteria; c__Gammaproteobacteria;<br>o__Pseudomonadales; f__Pseudomonadaceae; g__Pseudomonas; s__ |
| 4435983 | k__Bacteria; p__Proteobacteria; c__Gammaproteobacteria;<br>o__Pseudomonadales; f__Pseudomonadaceae; g__Pseudomonas; s__ |
| 144452  | k__Bacteria; p__Proteobacteria; c__Gammaproteobacteria;<br>o__Pseudomonadales; f__Pseudomonadaceae; g__Pseudomonas; s__ |
| 219457  | k__Bacteria; p__Proteobacteria; c__Gammaproteobacteria;<br>o__Pseudomonadales; f__Pseudomonadaceae; g__Pseudomonas; s__ |
| 99682   | k__Bacteria; p__Proteobacteria; c__Gammaproteobacteria;<br>o__Pseudomonadales; f__Pseudomonadaceae; g__Pseudomonas; s__ |
| 4475523 | k__Bacteria; p__Proteobacteria; c__Gammaproteobacteria;<br>o__Pseudomonadales; f__Pseudomonadaceae; g__Pseudomonas; s__ |
| 4320653 | k__Bacteria; p__Proteobacteria; c__Gammaproteobacteria;<br>o__Pseudomonadales; f__Pseudomonadaceae; g__Pseudomonas; s__ |
| 828623  | k__Bacteria; p__Proteobacteria; c__Gammaproteobacteria;<br>o__Pseudomonadales; f__Pseudomonadaceae; g__Pseudomonas; s__ |
| 217410  | k__Bacteria; p__Proteobacteria; c__Gammaproteobacteria;<br>o__Pseudomonadales; f__Pseudomonadaceae; g__Pseudomonas; s__ |
| 513808  | k__Bacteria; p__Proteobacteria; c__Gammaproteobacteria;<br>o__Pseudomonadales; f__Pseudomonadaceae; g__Pseudomonas; s__ |
| 28841   | k__Bacteria; p__Proteobacteria; c__Gammaproteobacteria;<br>o__Pseudomonadales; f__Pseudomonadaceae; g__Pseudomonas; s__ |
| 269901  | k__Bacteria; p__Proteobacteria; c__Gammaproteobacteria;<br>o__Pseudomonadales; f__Pseudomonadaceae; g__Pseudomonas; s__ |
| 1119175 | k__Bacteria; p__Proteobacteria; c__Gammaproteobacteria;<br>o__Pseudomonadales; f__Pseudomonadaceae; g__Pseudomonas; s__ |
| 4353093 | k__Bacteria; p__Proteobacteria; c__Gammaproteobacteria;<br>o__Pseudomonadales; f__Pseudomonadaceae; g__Pseudomonas; s__ |
| 780261  | k__Bacteria; p__Proteobacteria; c__Gammaproteobacteria;<br>o__Pseudomonadales; f__Pseudomonadaceae; g__Pseudomonas; s__ |

|         |                                                                                                                                         |
|---------|-----------------------------------------------------------------------------------------------------------------------------------------|
| 287032  | k__Bacteria; p__Proteobacteria; c__Gammaproteobacteria;<br>o__Pseudomonadales; f__Pseudomonadaceae; g__Pseudomonas; s__                 |
| 256834  | k__Bacteria; p__Proteobacteria; c__Gammaproteobacteria;<br>o__Pseudomonadales; f__Pseudomonadaceae; g__Pseudomonas; s__                 |
| 170405  | k__Bacteria; p__Proteobacteria; c__Gammaproteobacteria;<br>o__Pseudomonadales; f__Pseudomonadaceae; g__Pseudomonas; s__                 |
| 1118259 | k__Bacteria; p__Proteobacteria; c__Gammaproteobacteria;<br>o__Pseudomonadales; f__Pseudomonadaceae; g__Pseudomonas; s__                 |
| 4451011 | k__Bacteria; p__Proteobacteria; c__Gammaproteobacteria;<br>o__Pseudomonadales; f__Pseudomonadaceae; g__Pseudomonas; s__                 |
| 4408227 | k__Bacteria; p__Proteobacteria; c__Gammaproteobacteria;<br>o__Pseudomonadales; f__Pseudomonadaceae; g__Pseudomonas; s__                 |
| 4372132 | k__Bacteria; p__Proteobacteria; c__Gammaproteobacteria;<br>o__Pseudomonadales; f__Pseudomonadaceae; g__Pseudomonas; s__                 |
| 170417  | k__Bacteria; p__Proteobacteria; c__Gammaproteobacteria;<br>o__Pseudomonadales; f__Pseudomonadaceae; g__Pseudomonas; s__                 |
| 3964538 | k__Bacteria; p__Proteobacteria; c__Gammaproteobacteria;<br>o__Pseudomonadales; f__Pseudomonadaceae; g__Pseudomonas; s__                 |
| 109263  | k__Bacteria; p__Proteobacteria; c__Gammaproteobacteria;<br>o__Pseudomonadales; f__Pseudomonadaceae; g__Pseudomonas; s__                 |
| 227761  | k__Bacteria; p__Proteobacteria; c__Gammaproteobacteria;<br>o__Pseudomonadales; f__Pseudomonadaceae; g__Pseudomonas; s__                 |
| 144048  | k__Bacteria; p__Proteobacteria; c__Gammaproteobacteria;<br>o__Pseudomonadales; f__Pseudomonadaceae; g__Pseudomonas; s__                 |
| 279231  | k__Bacteria; p__Proteobacteria; c__Gammaproteobacteria;<br>o__Pseudomonadales; f__Pseudomonadaceae; g__Pseudomonas; s__                 |
| 4404312 | k__Bacteria; p__Proteobacteria; c__Gammaproteobacteria;<br>o__Pseudomonadales; f__Pseudomonadaceae; g__Pseudomonas; s__                 |
| 544313  | k__Bacteria; p__Proteobacteria; c__Gammaproteobacteria;<br>o__Pseudomonadales; f__Pseudomonadaceae; g__Pseudomonas; s__                 |
| 3913171 | k__Bacteria; p__Proteobacteria; c__Gammaproteobacteria;<br>o__Pseudomonadales; f__Pseudomonadaceae; g__Pseudomonas; s__                 |
| 4389037 | k__Bacteria; p__Proteobacteria; c__Gammaproteobacteria;<br>o__Pseudomonadales; f__Pseudomonadaceae; g__Pseudomonas; s__                 |
| 60329   | k__Bacteria; p__Proteobacteria; c__Gammaproteobacteria;<br>o__Pseudomonadales; f__Pseudomonadaceae; g__Pseudomonas; s__                 |
| 728119  | k__Bacteria; p__Proteobacteria; c__Gammaproteobacteria;<br>o__Pseudomonadales; f__Pseudomonadaceae; g__Pseudomonas; s__                 |
| 61102   | k__Bacteria; p__Proteobacteria; c__Gammaproteobacteria;<br>o__Pseudomonadales; f__Pseudomonadaceae; g__Pseudomonas;<br>s__citronellolis |
| 295031  | k__Bacteria; p__Proteobacteria; c__Gammaproteobacteria;<br>o__Pseudomonadales; f__Pseudomonadaceae; g__Pseudomonas; s__fragi            |
| 327694  | k__Bacteria; p__Proteobacteria; c__Gammaproteobacteria;<br>o__Pseudomonadales; f__Pseudomonadaceae; g__Pseudomonas; s__fragi            |

|         |                                                                                                                                         |
|---------|-----------------------------------------------------------------------------------------------------------------------------------------|
| 247615  | k__Bacteria; p__Proteobacteria; c__Gammaproteobacteria;<br>o__Pseudomonadales; f__Pseudomonadaceae; g__Pseudomonas;<br>s__nitroreducens |
| 4339214 | k__Bacteria; p__Proteobacteria; c__Gammaproteobacteria;<br>o__Pseudomonadales; f__Pseudomonadaceae; g__Pseudomonas;<br>s__nitroreducens |
| 226424  | k__Bacteria; p__Proteobacteria; c__Gammaproteobacteria;<br>o__Pseudomonadales; f__Pseudomonadaceae; g__Pseudomonas;<br>s__nitroreducens |
| 138840  | k__Bacteria; p__Proteobacteria; c__Gammaproteobacteria;<br>o__Pseudomonadales; f__Pseudomonadaceae; g__Pseudomonas;<br>s__umsongensis   |
| 2589305 | k__Bacteria; p__Proteobacteria; c__Gammaproteobacteria;<br>o__Pseudomonadales; f__Pseudomonadaceae; g__Pseudomonas;<br>s__veronii       |
| 276867  | k__Bacteria; p__Proteobacteria; c__Gammaproteobacteria;<br>o__Pseudomonadales; f__Pseudomonadaceae; g__Pseudomonas;<br>s__veronii       |
| 556184  | k__Bacteria; p__Proteobacteria; c__Gammaproteobacteria;<br>o__Pseudomonadales; f__Pseudomonadaceae; g__Pseudomonas;<br>s__veronii       |
| 4432796 | k__Bacteria; p__Proteobacteria; c__Gammaproteobacteria;<br>o__Pseudomonadales; f__Pseudomonadaceae; g__Pseudomonas;<br>s__viridiflava   |
| 265715  | k__Bacteria; p__Proteobacteria; c__Gammaproteobacteria;<br>o__Pseudomonadales; f__Pseudomonadaceae; g__Pseudomonas;<br>s__viridiflava   |

**Supplementary Figure 1. T cell subsets in the CD4+ T population before culture.** (a) Pre- and post-isolated CD4+ T cells were stained with cell surface markers, and assessed for % naïve/memory population by flow cytometry. (b) Isolated CD4+ T cells stained with cell surface surrogate markers for T cell subsets, and assessed for % T cell subsets by flow cytometry. (Treg: CD4+CD25+CD127-; Th17: CD4+CD45RO+CXCR3-CCR4+CCR6+; Th1:CD4+CD45RO+CXCR3+CCR4-CCR6-; Th1\*:CD4+CD45RO+CXCR3+CCR4-CCR6+; Th2: CD4+CD45RO+CXCR3-CCR4+CCR6-)

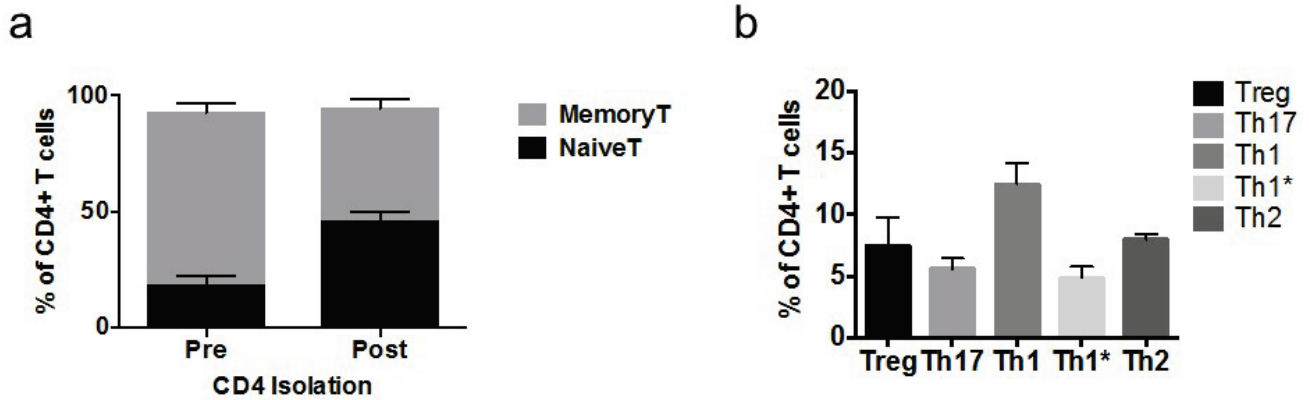

**Supplementary Figure 2. Levels of human Th17 induction among study donors.** (a, b) We cultured isolated CD4+ T cells for 14 days with Th17 polarizing cytokines, and thereafter assessed cells for intracellular IL-17A expression by flow cytometry and supernatant IL-17A levels by multiplex Luminex assay. Each bar represents data from one donor. Mean  $\pm$  SEM calculated from 3 technical replicates. (c) XY-plot shows the correlation between intracellular and secreted IL-17A. Each dot represents one donor. Gray dots indicate donor samples that did not meet assay quality control cut-off.

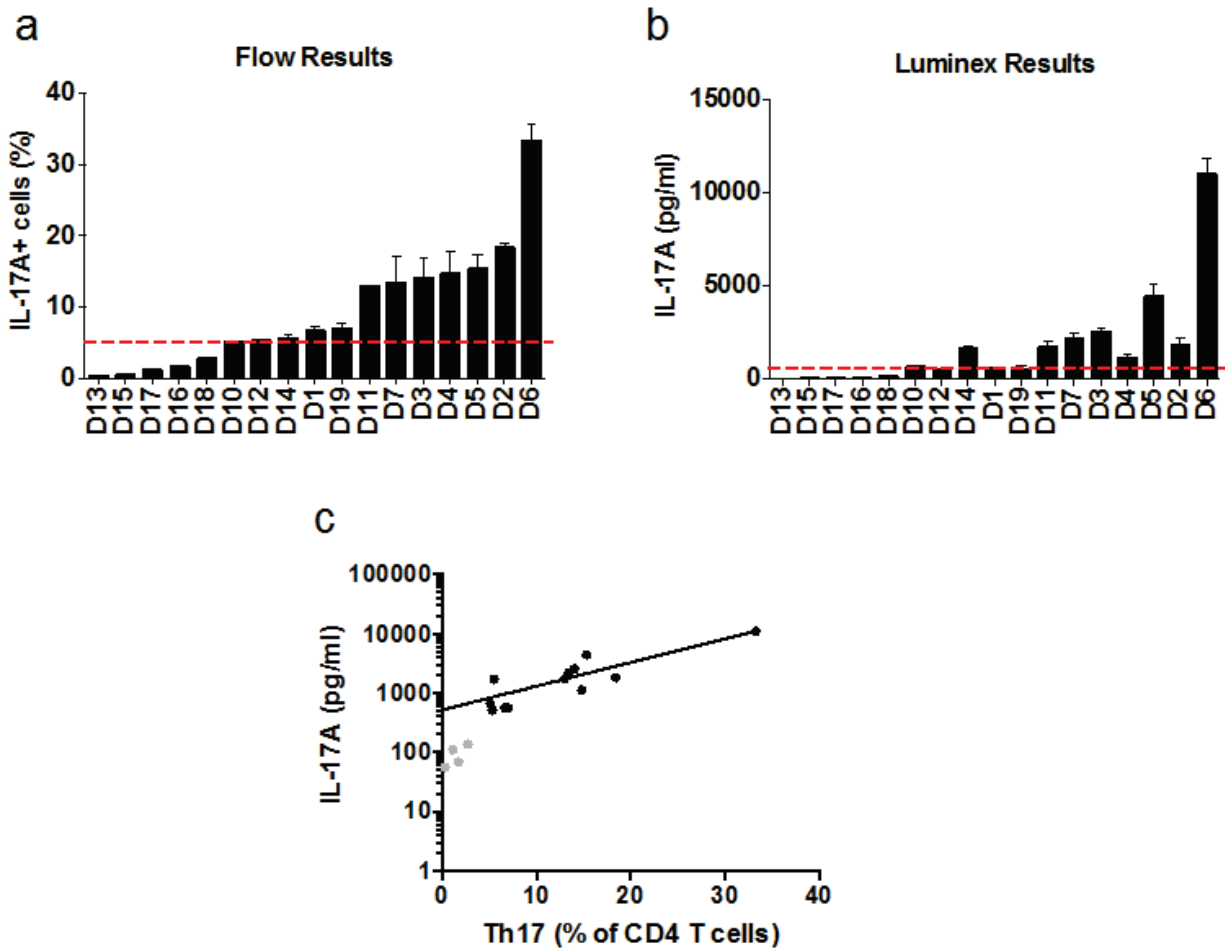

**Supplementary Figure 3. Normalized cell numbers after 14-days culture with each metabolite.** Absolute counts were determined by using CountBright™ Absolute Counting Beads (Molecular Probes Cat C36950) and assayed via flow cytometry. The highest metabolite concentration is presented after excluding all toxic concentrations. The cell counts were normalized by the polarized, metabolite untreated condition performed in the same batch of experiment (shown as Ctrl, set as 1).

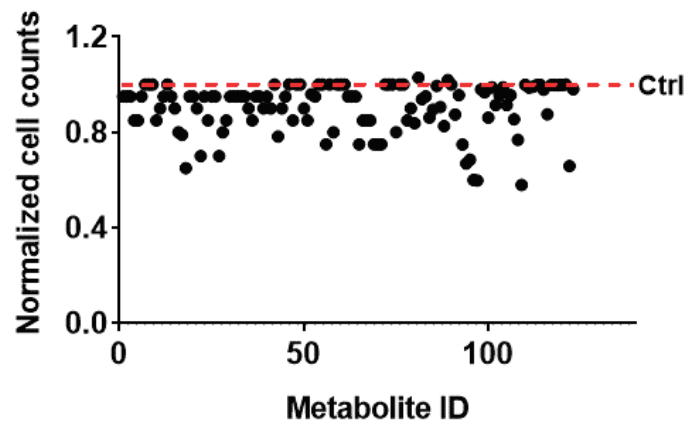

**Supplementary Figure 4. Bioactivity of metabolites with previously reported effects on CD4+ T cells.** Secreted cytokines levels of CD4+ T cells cultured under polarizing Th17 conditions with the indicated metabolites. (a) Butyric acid, (b) arachidonic acid, and (c) L-glutamate. We show data from two biological replicates (black and gray). Mean  $\pm$  SEM calculated from three technical replicates.

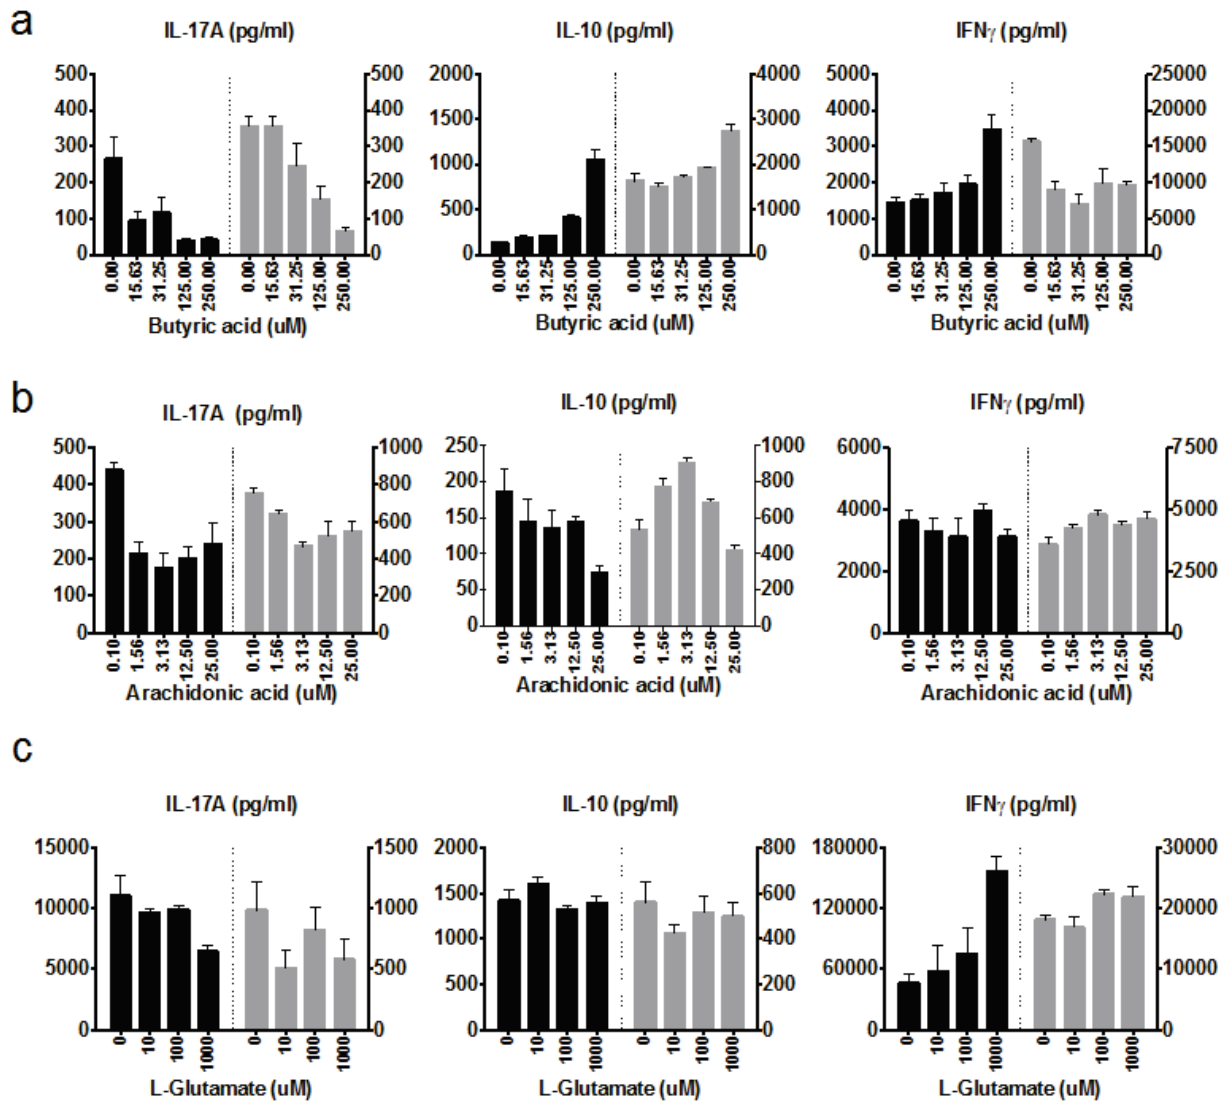



**Supplementary Figure 5. Metabolites with pan-effects on cytokine production.** Secreted cytokines from CD4+ T cells cultured under polarizing Th17 conditions with the indicated metabolites. We show data from independent biological replicates for each metabolite (black, dark-gray, light-gray, and white). CoA: Coenzyme A; HMG-CoA: 3-hydroxy-3-methyl-glutaryl-coenzyme A. (a) Metabolites with apparent pan-inhibition. (b) Metabolites with apparent pan-enhancement. N.A., conditions causing cell death and hence excluded. Mean  $\pm$  SEM calculated from 3 technical replicates.

**a**

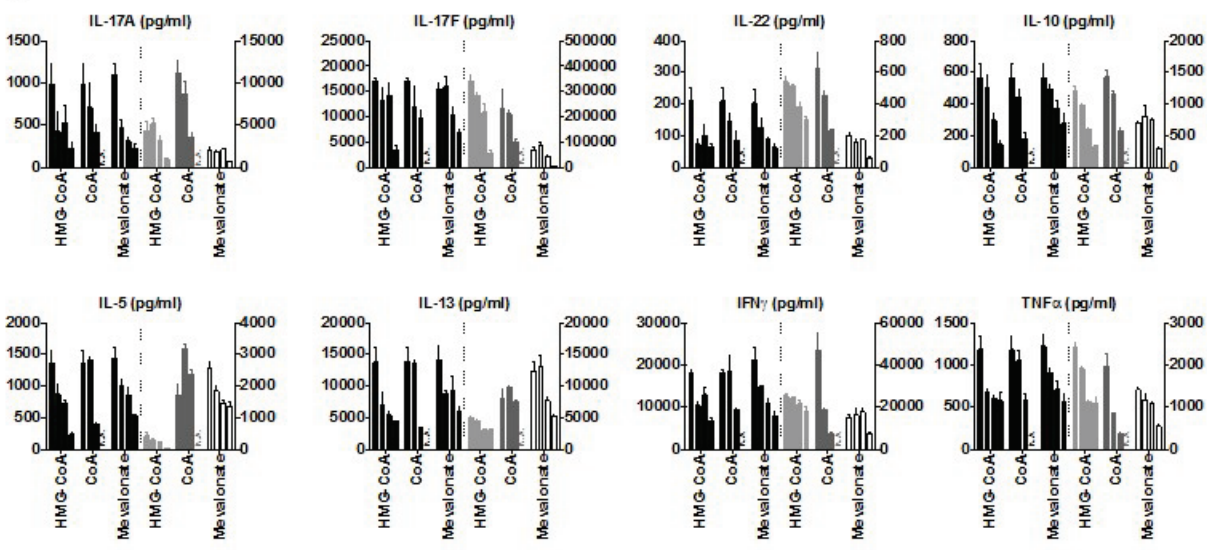

**b**

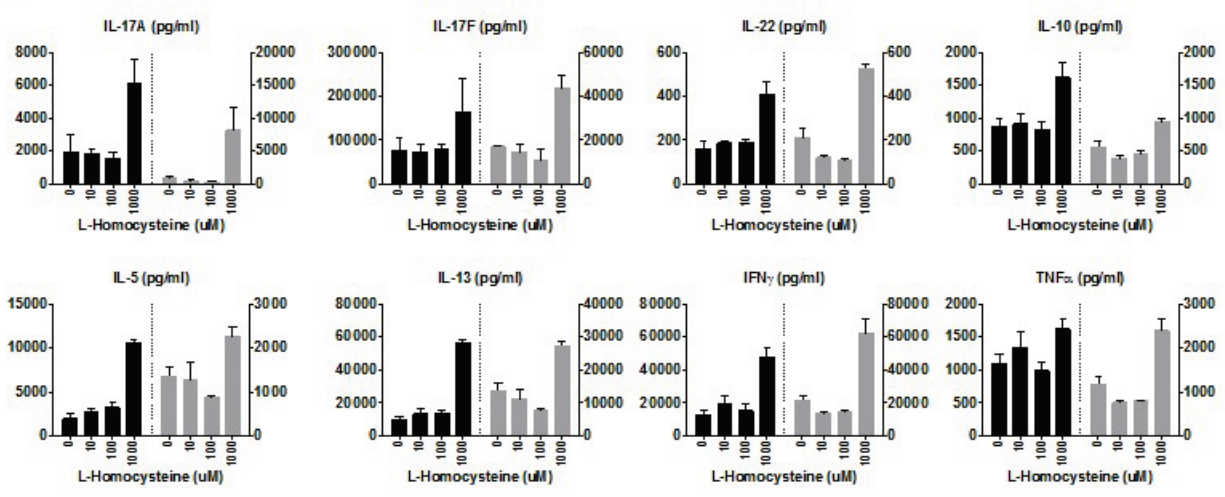

**Supplementary Figure 6. Metabolites with selective effects on cytokine production.** Secreted cytokines from CD4+ T cells cultured under polarizing Th17 conditions with the indicated metabolites. (a) IPP: isopentenyl diphosphate. (b) Pyridoxine phosphate. N.A.: conditions that caused cell death and excluded. Mean  $\pm$  SEM calculated from 3 technical replicates.

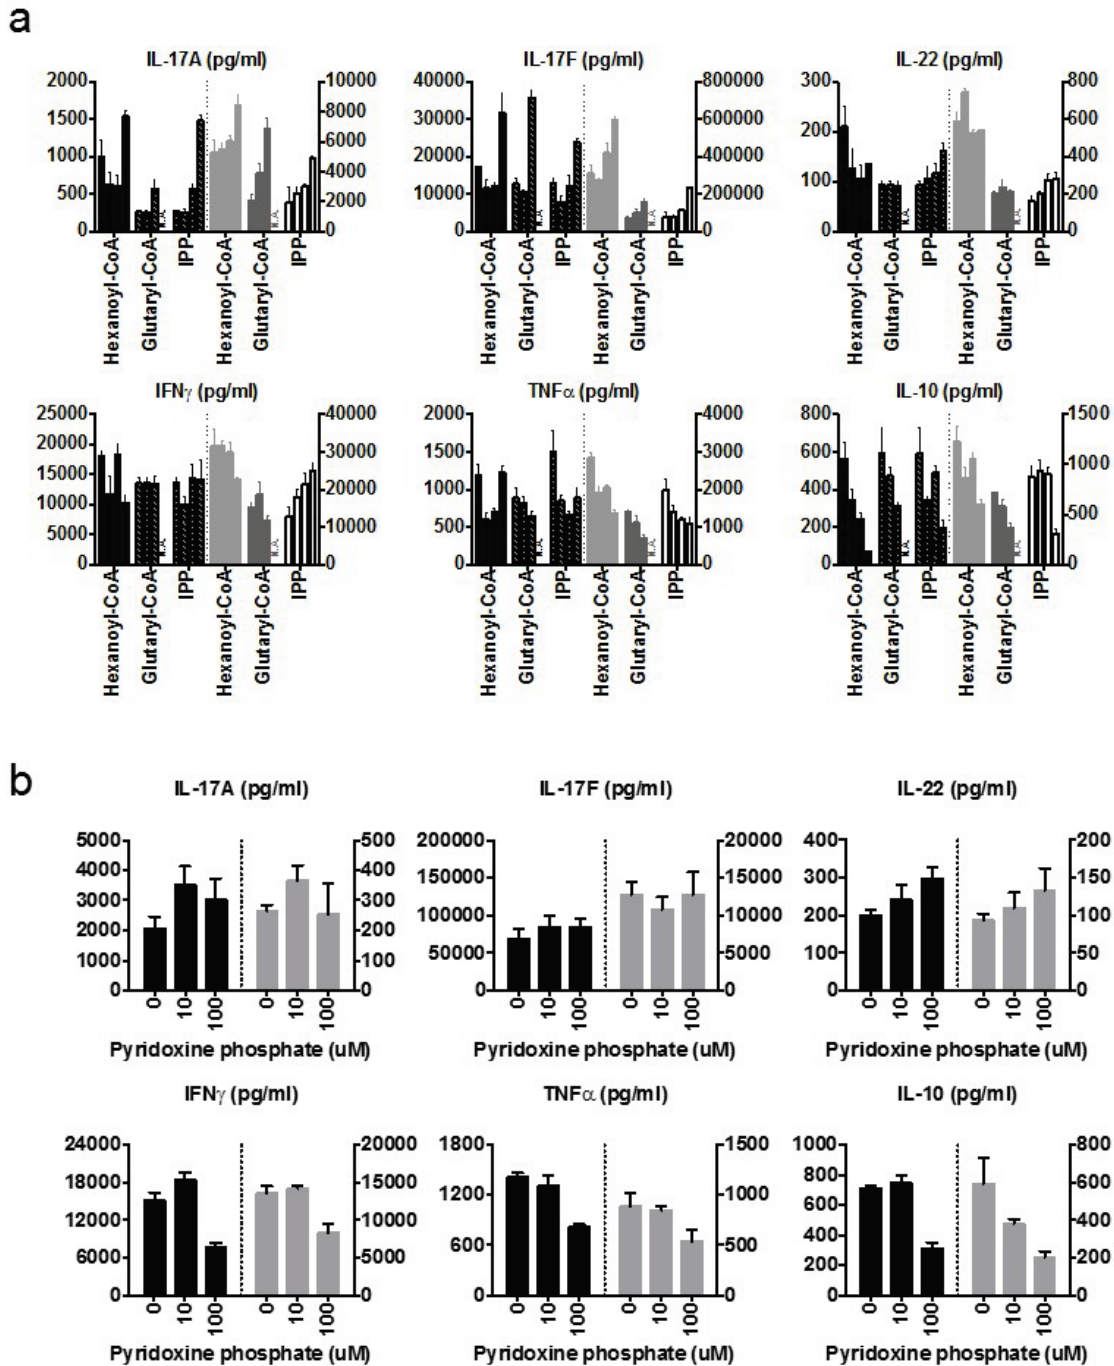

**Supplementary Figure 7. GLUT1 knockdown efficiency.** The knockdown efficiencies of GLUT1 siRNA were determined by immunoblotting using anti-GLUT1 antibody (Abcam ab115730). Isolated CD4<sup>+</sup> T cells were transiently transfected with GLUT1 or scramble siRNA clones purchased from Dharmacon (ON-TARGETplus). After 4 hours of transfection, cells were activated with anti-CD3 and anti-CD28 with IL-2 supplement for additional 48 hours and lysed for western blot. Three independent experiments were performed and the representative plot is shown.

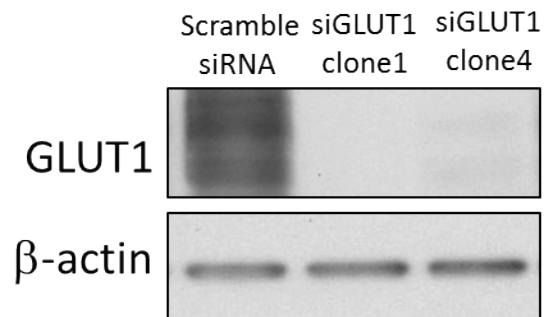

Supplement: NIHMS949312-supplement-supplement_file.pdf [file NIHMS949312-supplement-supplement_file.pdf]
